# Supplementary material for: Evolutionary Wheat Populations in High-Quality Breadmaking as a Tool to Preserve Agri-Food Biodiversity
Source: MDPI journal article supplement (doi:10.3390/foods11040495), 2022-02-09
Supplement: s1 [file s1]

Article

# Evolutionary wheat populations in high-quality breadmaking as a tool to preserve agro-food biodiversity

Marco Spaggiari<sup>1</sup>, Mia Marchini<sup>2</sup>, Luca Calani<sup>1</sup>, Rossella Dodi<sup>3</sup>, Giuseppe Di Pede<sup>1</sup>, Margherita Dall'Asta<sup>4</sup>, Francesca Scazzina<sup>1</sup>, Andrea Barbieri<sup>5</sup>, Laura Righetti<sup>1</sup>, Silvia Folloni<sup>2,\*</sup>, Roberto Ranieri<sup>2</sup>, Chiara Dall'Asta<sup>1</sup>, Gianni Galaverna<sup>1</sup>

<sup>1</sup> Department of Food and Drug, University of Parma, Parco Area delle Scienze 17/A, 43124 Parma, Italy; marco.spaggiari1@studenti.unipr.it (M.S.); luca.calani@unipr.it (L.C.); giuseppe.dipede@unipr.it (G.D.P.); francesca.scazzina@unipr.it (F.S.); laura.righetti@unipr.it (L.R.); chiara.dallasta@unipr.it (C.D.); gianni.galaverna@unipr.it (G.G.).

<sup>2</sup> Open Fields s.r.l., str. Madonna dell'Aiuto 7/A, Parma, Italy; m.marchini@openfields.it (M.M.); r.ranieri@openfields.it (R.R.).

<sup>3</sup> Department of Veterinary Science, University of Parma, Strada del Taglio 10, 43126 Parma, Italy; rossella.dodi@unipr.it (R.D.).

<sup>4</sup> Faculty of Agriculture, Food and Environmental Sciences, Catholic University of the Sacred Heart, via Emilia Parmense 84, 29122 Piacenza, Italy; margherita.dallasta@unicatt.it (M.D.).

<sup>5</sup> Molino Grassi SpA, via Emilia ovest 347, 43126 Fraore Parma, Italy; andreabarbieri@molinograssi.it (A.B.).

\* Correspondence: s.folloni@openfields.it (S.F.); Tel.: +39 05211812730

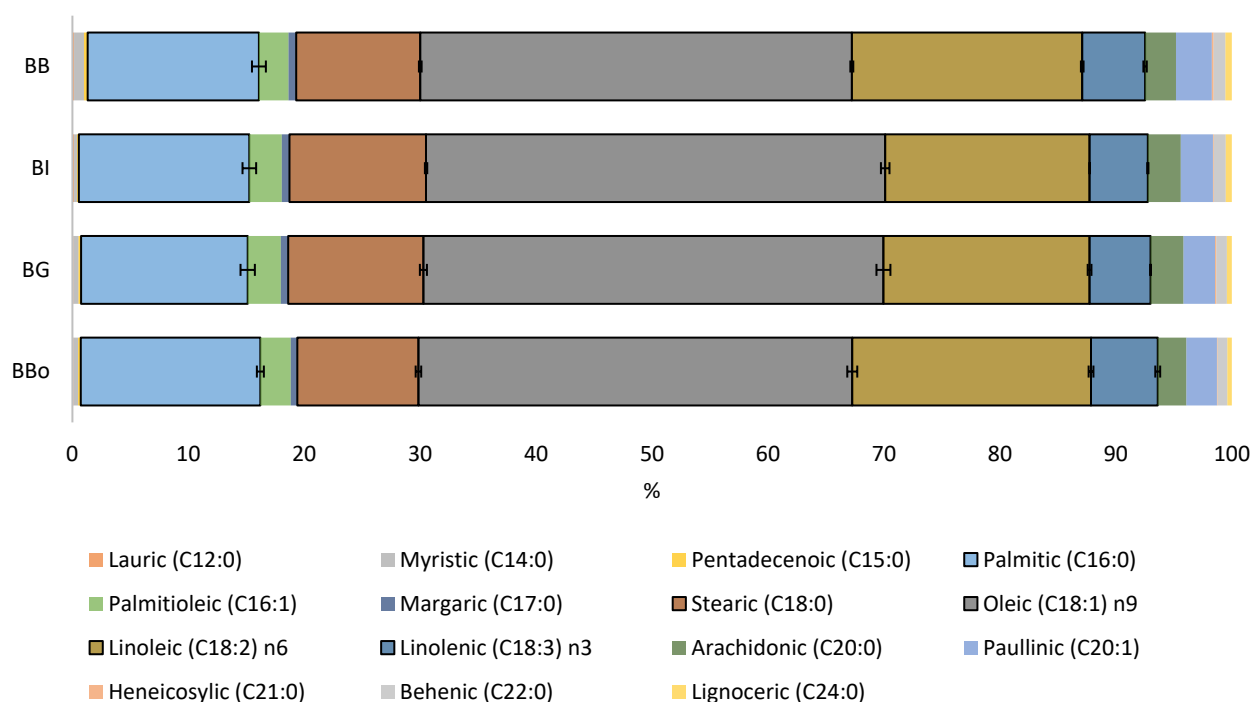

**Figure S1** Fatty acids (FAs) profile of the different breads. Results are reported as cumulative percentage (%) of FAs. BB, bread produced using BIO2 EP; BI, bread produced using ICARDA EP; BG, bread produced using Grossi EP; BBo, bread produced using cv. Bologna.

**Table S1** Mass spectrometry characteristics of nicotinamide, nicotinic acid, thiamine, and folic acid.

| Compound       | CID | Monitored ion<br><br>[M+H] <sup>+</sup> | Monitored transitions *<br><br>( <i>m/z</i> )    |
|----------------|-----|-----------------------------------------|--------------------------------------------------|
|                |     |                                         |                                                  |
| Nicotinamide   | 40  | 123                                     | 123 → <b>80</b> ; 123 → 95; 123 → 105; 123 → 122 |
| Nicotinic acid | 37  | 124                                     | 124 → <b>80</b> ; 124 → 123; 124 → 105           |
| Thiamine       | 22  | 265                                     | 265 → <b>122</b> ; 265 → 144                     |
| Folic acid     | 17  | 442                                     | 442 → <b>295</b> ; 442 → 313                     |

CID: Collision Induced Dissociation. \* The quantifier ion (*m/z*) is reported in bold.**Table S2** Standard deviation (n=3) of the grain quality parameters of EPs and cv. Bologna.

| Wheat     | Test weight (kg/hL) | Thousand kernel weight (g) | Protein content (%, d.m.) | Alveograph             |                         |        |      |
|-----------|---------------------|----------------------------|---------------------------|------------------------|-------------------------|--------|------|
|           |                     |                            |                           | W (10 <sup>-4</sup> J) | P (mm H <sub>2</sub> O) | L (mm) | P/L  |
| Bio2 EP   | 1                   | 0                          | 1.28                      | 13.50                  | 1.5                     | 9      | 0.07 |
| ICARDA EP | 3                   | 0                          | 1.72                      | 8.50                   | 2                       | 11.5   | 0.06 |
| Grossi EP | 2                   | 1                          | 0.53                      | 8.50                   | 1                       | 16.5   | 0.02 |
| Bologna   | 0                   | 1                          | 0.40                      | 4.00                   | 1.5                     | 0.5    | 0.05 |

EP, evolutionary wheat population.

**Table S3** Standard deviation (n=3) of the nutritional and chemical composition of the bread formulated using the wheat evolutionary population (BB, BI and BG) and bread produced using flour from cv. Bologna wheat (BBo).

|                              | BB   | BI   | BG   | BBo  |
|------------------------------|------|------|------|------|
| Carbohydrates (g/100 g)      | 1.2  | 1.1  | 1.3  | 1.4  |
| Total dietary fibre (g/100g) | 0.94 | 0.89 | 0.95 | 1.03 |
| Lipids (g/100g)              | 0.01 | 0.03 | 0.03 | 0.07 |
| SFA (%)                      | 0.4  | 0.1  | 0.8  | 0.6  |
| MUFA (%)                     | 0.2  | 0.2  | 0.6  | 0.6  |
| PUFA (%)                     | 0.3  | 0.1  | 0.2  | 0.1  |
| Ω-6 / Ω-9                    | 0.1  | 0.1  | 0.0  | 0.2  |
| Proteins (g/100g)            | 1.3  | 1.7  | 1.1  | 1.6  |
| Mg (mg/100g)                 | 2.5  | 2.2  | 2.1  | 3.2  |
| Zn (mg/100g)                 | 0.17 | 0.15 | 0.16 | 0.16 |
| Fe (mg/100g)                 | 0.21 | 0.13 | 0.17 | 0.21 |
| Se (μg/100g)                 | 0.20 | 0.20 | 0.22 | 0.22 |
| Thiamine (mg/100g)           | 0.01 | 0.01 | 0.01 | 0.12 |

|                          |      |      |      |      |
|--------------------------|------|------|------|------|
| Nicotinic acid (mg/100g) | <LOQ | <LOQ | <LOQ | <LOQ |
| Folic acid (µg /100g)    | <LOQ | <LOQ | <LOQ | <LOQ |
| Nicotinamide (mg/100g)   | 0.01 | 0.11 | 0.01 | 0.10 |

<LOQ Folic acid: 5 µg/100 g; <LOQ Nicotinic acid: 0.01 mg/100 mg, Mg, magnesium; Zn, zinc; Fe, iron; Se, selenium; NAM, nicotinamide; BB, bread produced using BIO2 EP; BI, bread produced using ICARDA EP; BG, bread produced using Grossi EP; BBo, bread produced using cv. Bologna.  
\*: Calories (kJ and kcal) were calculated as sum of nutritive components.

**Table S4** Standard deviation (n=3) of the micronutrients content in flours

|                            | FB   | FI   | FG   | FBo  |
|----------------------------|------|------|------|------|
| Mg (mg/100g) *             | 2.9  | 2.6  | 2.9  | 4.4  |
| Zn (mg/100g) *             | 0.23 | 0.19 | 0.22 | 0.24 |
| Fe (mg/100g) *             | 0.27 | 0.13 | 0.27 | 0.28 |
| Se (µg /100g) **           | 0.68 | 0.62 | 0.85 | 0.99 |
| Thiamine (mg/100g) *       | 0.01 | 0.00 | 0.08 | 0.03 |
| Nicotinic acid (mg/100g) * | <LOQ | <LOQ | <LOQ | <LOQ |
| Nicotinamide (mg/100g) *   | 0.03 | <LOQ | 0.08 | 0.01 |
| Folic acid (µg /100g) **   | 4.4  | <LOQ | <LOQ | <LOQ |

\* <LOQ, 0.01 mg/100g; \*\* <LOQ, 0.5 µg/100 g. FB, BIO2 EP Type 1 flour; FI, ICARDA EP Type 1 flour; FG, Grossi EP Type 1 flour; FBo, cv. Bologna Type 1 flour.

**Table S5** Standard deviation (n=3) of the total phenolic content (TPC) and phenolic acid (PA) profile in their free (soluble) and bound (insoluble) forms.

| Sample | TPC             |       | 4-HB       |       | p-C  |       | Caff |       | t-Fer |       | c-Fer | Sin  |       |
|--------|-----------------|-------|------------|-------|------|-------|------|-------|-------|-------|-------|------|-------|
|        | Free            | Bound | Free       | Bound | Free | Bound | Free | Bound | Free  | Bound |       | Free | Bound |
| Flours | mg GAE/Kg d. m. |       | mg/Kg d.w. |       |      |       |      |       |       |       |       |      |       |
| FB     | 23.98           | 92.15 | 0.01       | <LOQ  | <LOQ | 0.01  | 0.0  | 0.03  | 0.06  | 0.12  | 0.08  | 0.04 | 0.11  |
| FI     | 13.83           | 38.67 | 0.01       | <LOQ  | 0.01 | 0.01  | 0.01 | 0.01  | 0.05  | 0.15  | 0.02  | 0.01 | 0.03  |
| FG     | 12.73           | 64.37 | <LOQ       | <LOQ  | 0.01 | 0.01  | 0.02 | 0.01  | 0.13  | 0.16  | 0.15  | 0.03 | 0.07  |
| FBo    | 9.60            | 41.65 | <LOQ       | <LOQ  | <LOQ | 0.03  | 0.02 | 0.01  | 0.14  | 0.20  | 0.01  | 0.01 | 0.1   |
| Breads |                 |       |            |       |      |       |      |       |       |       |       |      |       |
| BB     | 35.43           | 33.41 | <LOQ       | 0.04  | <LOQ | 0.01  | <LOQ | 0.04  | 0.3   | 0.25  | 4.11  | <LOQ | 0.15  |
| BI     | 13.86           | 3.06  | <LOQ       | 0.1   | <LOQ | 0.11  | <LOQ | 0.01  | 0.21  | 3.00  | 8.23  | 0.11 | 0.07  |
| BG     | 8.07            | 4.05  | <LOQ       | 0.1   | 0.04 | 0.07  | <LOQ | 0.01  | 0.34  | 1.46  | 1.79  | 0.04 | 0.47  |
| BBo    | 0.36            | 16.55 | 0.04       | 0.15  | 0.01 | 0.51  | <LOQ | 0.15  | 0.20  | 9.55  | 2.49  | <LOQ | 1.19  |

<LOQ: 0.05 mg/kg. GAE, Gallic Acid Equivalents; d. m., dry matter; 4-HB, hydroxybenzoic acid; p-C, para coumaric acid; caff, caffeic acid; t-fer, trans-ferulic acid; c-fer, cis-ferulic acid; Sin, sinapic acid. FB, BIO2 EP Type 1 flour; FI, ICARDA EP Type 1 flour; FG, Grossi EP Type 1 flour; FBo, cv. Bologna Type 1 flour; BB, bread produced using BIO2 EP; BI, bread produced using ICARDA EP; BG, bread produced using Grossi EP; BBo, bread produced using cv. Bologna.

**Table S6** Standard deviation (n=59) of the sensory scores of breads obtained from acceptability test.

| Bread      | Texture |       | Colour |       | Appearance | Aroma | Taste | Overall acceptability |
|------------|---------|-------|--------|-------|------------|-------|-------|-----------------------|
|            | Crust   | Crumb | Crust  | Crumb |            |       |       |                       |
| <b>BI</b>  | 1.54    | 1.36  | 1.58   | 1.39  | 1.14       | 1.30  | 1.50  | 1.25                  |
| <b>BB</b>  | 1.52    | 1.10  | 1.23   | 1.19  | 1.19       | 1.24  | 1.39  | 1.03                  |
| <b>BG</b>  | 1.52    | 1.29  | 1.50   | 1.09  | 1.13       | 1.17  | 1.48  | 1.23                  |
| <b>BBo</b> | 1.75    | 1.55  | 1.46   | 1.89  | 1.59       | 1.39  | 1.66  | 1.41                  |

BB, bread produced using BIO2 EP; BI, bread produced using ICARDA EP; BG, bread produced using Grossi EP; BBo, bread produced using cv Bologna.

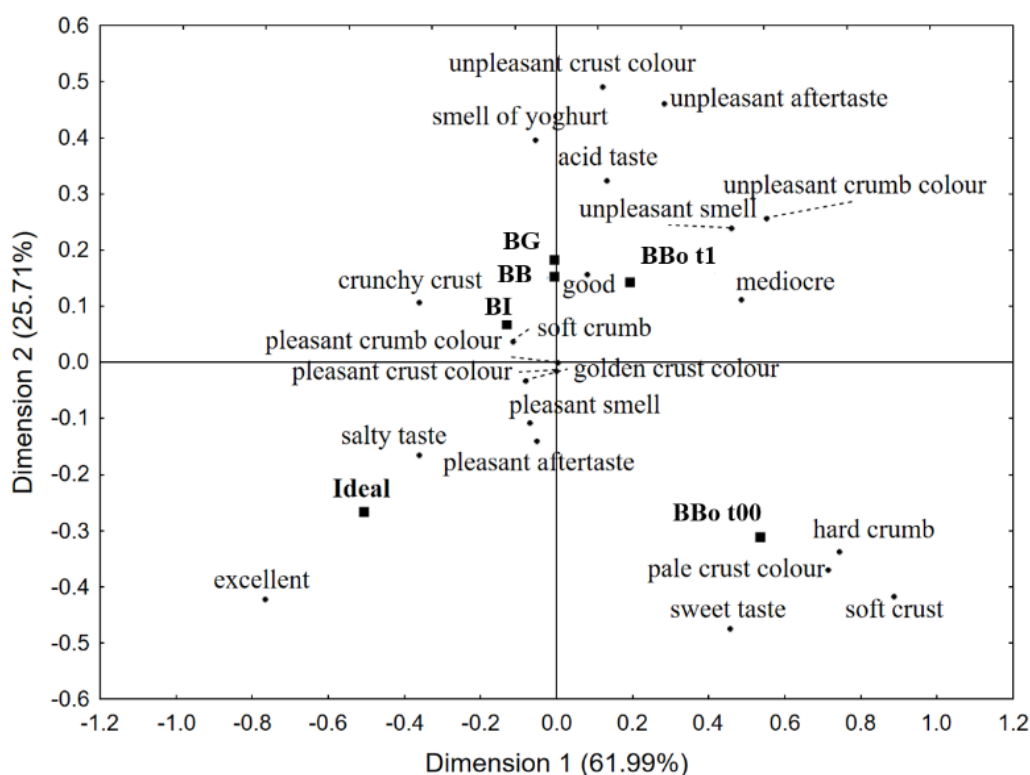

**Figure S2** Correspondence analysis of the bread samples and sensory attributes including a Bologna type 00 control bread. BB, bread produced using Bio2 EP; BI, bread produced using ICARDA EP; BG, bread produced using Grossi EP; BBo t00, bread produced using cv. Bologna flour type 00; BBo t1, bread produced using cv. Bologna flour type 1.
